# Supplementary material for: Low Plasma Proportion of Omega 3-Polyunsaturated Fatty Acids Predicts Poor Outcome in Acute Non-Cardiogenic Ischemic Stroke Patients
Source: PubMed Central journal article supplement — J Stroke. 2015 May 29;17(2):168–76. doi: 10.5853/jos.2015.17.2.168 (PMC4460336; doi:10.5853/jos.2015.17.2.168), 2015-05-29
Supplement: jos-17-168-s001.pdf [file jos-17-168-s001.pdf]

**Supplementary Table 1.** Comparison of proportions of  $\omega$ 3-PUFAs according to stroke subtypes

|                            | Stroke subtype                       |                                | <i>P</i> value |
|----------------------------|--------------------------------------|--------------------------------|----------------|
|                            | Large artery atherosclerosis<br>n=60 | Small vessel occlusion<br>n=96 |                |
| EPA (%)                    | 1.9±0.7                              | 2.1±0.7                        | 0.212          |
| DHA (%)                    | 8.8±1.4                              | 9.0±1.3                        | 0.369          |
| $\Sigma\omega$ 3-PUFAs (%) | 11.6±1.9                             | 12.1±1.9                       | 0.195          |

Values are presented as mean  $\pm$  standard deviation.

EPA, 20:5  $\omega$ 3 eicosapentaenoic acid; DHA, 22:6  $\omega$ 3 docosahexaenoic acid; PUFAs, polyunsaturated fatty acids;  $\Sigma\omega$ 3-PUFAs = sum of omega 3 PUFAs 18:3  $\omega$ 3  $\alpha$ -linolenic acid, 20:3  $\omega$ 3 eicosatrienoic acid, EPA, and DHA.
