# Supplementary material for: Low Plasma Proportion of Omega 3-Polyunsaturated Fatty Acids Predicts Poor Outcome in Acute Non-Cardiogenic Ischemic Stroke Patients
Source: PubMed Central journal article supplement — J Stroke. 2015 May 29;17(2):168–76. doi: 10.5853/jos.2015.17.2.168 (PMC4460336; doi:10.5853/jos.2015.17.2.168), 2015-05-29
Supplement: jos-17-168-s002.pdf [file jos-17-168-s002.pdf]

**Supplementary Table 2.** The relationship between fatty acids composition and stroke severity on admission\* according to stroke subtypes

|                         | Large artery atherosclerosis |                |                          |                | Small vessel occlusion   |                |                          |                |
|-------------------------|------------------------------|----------------|--------------------------|----------------|--------------------------|----------------|--------------------------|----------------|
|                         | Unadjusted                   |                | Adjusted                 |                | Unadjusted               |                | Adjusted                 |                |
|                         | $\beta$ (standard error)     | <i>P</i> value | $\beta$ (standard error) | <i>P</i> value | $\beta$ (standard error) | <i>P</i> value | $\beta$ (standard error) | <i>P</i> value |
| EPA <sup>†</sup>        | -1.485 (0.891)               | 0.101          | -0.976 (0.932)           | 0.30           | -0.723 (0.274)           | 0.010          | -0.486 (0.290)           | 0.101          |
| DHA*                    | -0.780 (0.343)               | 0.048          | -0.498 (0.175)           | 0.008          | -0.560 (0.147)           | 0.001          | -0.476 (0.165)           | 0.005          |
| $\Sigma\omega$ 3-PUFAs* | -0.725 (0.330)               | 0.032          | -0.700 (0.372)           | 0.065          | -0.378 (0.103)           | 0.001          | -0.305 (0.119)           | 0.012          |

\*Multivariate linear regression analysis; <sup>†</sup>Adjusted age, sex, and variables with *P*value <0.1 in univariate analysis (hemoglobin, high-density lipoprotein, high sensitivity C-reactive protein, fasting glucose, 16:0 palmitic acid and sum ( $\Sigma$ ) of saturated fatty acids).

EPA, 20:5  $\omega$ 3 eicosapentaenoic acid; DHA, 22:6  $\omega$ 3 docosahexaenoic acid; PUFAs, polyunsaturated fatty acids;  $\Sigma\omega$ 3-PUFAs=sum of omega 3 PUFAs 18:3  $\omega$ 3  $\alpha$ -linolenic acid, 20:3  $\omega$ 3 eicosatrienoic acid, EPA, and DHA.
