# Supplementary material for: Low Plasma Proportion of Omega 3-Polyunsaturated Fatty Acids Predicts Poor Outcome in Acute Non-Cardiogenic Ischemic Stroke Patients
Source: PubMed Central journal article supplement — J Stroke. 2015 May 29;17(2):168–76. doi: 10.5853/jos.2015.17.2.168 (PMC4460336; doi:10.5853/jos.2015.17.2.168), 2015-05-29
Supplement: jos-17-168-s003.pdf [file jos-17-168-s003.pdf]

**Supplementary Table 3.** Comparison of functional outcome based on occurrence of recurrent stroke

|               | Presence of recurrent stroke  |                             | <i>P</i> value |
|---------------|-------------------------------|-----------------------------|----------------|
|               | Recurrent stroke (-)<br>n=150 | Recurrent stroke (+)<br>n=6 |                |
| EPA (%)       | 2.0±0.7                       | 1.6±0.2                     | 0.006          |
| DHA (%)       | 8.9±1.3                       | 8.4±1.5                     | 0.339          |
| Σω3-PUFAs (%) | 11.9±1.9                      | 11.0±1.7                    | 0.270          |

Values are presented as mean ± standard deviation.

EPA, 20:5 ω3 eicosapentaenoic acid; DHA, 22:6 ω3 docosahexaenoic acid; PUFAs, polyunsaturated fatty acids; Σω3-PUFAs = sum of omega 3 polyunsaturated fatty acids. (ω3-PUFA) 18:3 ω3 α-linolenic acid, 20:3 ω3 eicosatrienoic acid, EPA, and DHA.
