# Supplementary material for: Low Plasma Proportion of Omega 3-Polyunsaturated Fatty Acids Predicts Poor Outcome in Acute Non-Cardiogenic Ischemic Stroke Patients
Source: PubMed Central journal article supplement — J Stroke. 2015 May 29;17(2):168–76. doi: 10.5853/jos.2015.17.2.168 (PMC4460336; doi:10.5853/jos.2015.17.2.168), 2015-05-29
Supplement: jos-17-168-s004.pdf [file jos-17-168-s004.pdf]

**Supplementary Table 4.** The relationship between fatty acids composition and poor functional outcome\* according to stroke subtype

|                        | Stroke subtypes              |                |                        |                |
|------------------------|------------------------------|----------------|------------------------|----------------|
|                        | Large artery atherosclerosis | <i>P</i> value | Small vessel occlusion | <i>P</i> value |
| EPA <sup>†</sup>       | 0.70 (0.19-2.51)             | 0.593          | 0.03 (0.01-4.24)       | 0.175          |
| DHA <sup>†</sup>       | 0.62 (0.42-0.93)             | 0.023          | 0.49 (0.28-0.85)       | 0.012          |
| Σω3-PUFAs <sup>†</sup> | 0.65 (0.47-0.90)             | 0.011          | 0.64 (0.42-0.98)       | 0.044          |

Values are presented as odds ratio (95% confidence interval).

\*Multivariate binary logistic regression analysis with modified Rankin scale [0-2] as reference; <sup>†</sup>Adjusted age, sex, and variables with *P*value < 0.1 in univariate analysis (age, sex, smoking, National Institute of Health Stroke Scale score, stroke subtypes, and 16:0 palmitic acid) in each stroke subtype.

EPA, 20:5 ω3 eicosapentaenoic acid; DHA, 22:6 ω3 docosahexaenoic acid; PUFAs, polyunsaturated fatty acids; Σω3-PUFAs = sum of omega 3 PUFAs 18:3 ω3 α-linolenic acid, 20:3 ω3 eicosatrienoic acid, EPA, and DHA.
